# Supplementary material for: Hydrogen bonding-catalyzed synthesis of 1,4-dioxanes from dehydrative cyclization of vicinal diols in ionic liquids
Source: Royal Society of Chemistry journal article supplement (doi:10.1039/d3nj00097d), 2023-01-01
Supplement: d3nj00097d1.pdf [file d3nj00097d1.pdf]

## Supporting Information

### Hydrogen bonding-catalyzed synthesis of 1,4-dioxanes from dehydrative cyclization of vicinal diols in ionic liquids

Xiaoqian Chang,<sup>a,b</sup> Yuepeng Wang,<sup>a,b</sup> Yanfei Zhao,<sup>a,b</sup> Ying Wang,<sup>a,b</sup> Rongxiang Li,<sup>a,b</sup>  
Zhengang Ke,<sup>a,b</sup> Penglei Chen,<sup>\*a,b</sup> and Zhimin Liu,<sup>\*a,b</sup>

<sup>a</sup> Beijing National Laboratory for Molecular Sciences, CAS Key Laboratory of Colloid, Interface and Thermodynamics, CAS Research/Education Center for Excellence in Molecular Sciences, Institute of Chemistry, Chinese Academy of Sciences, Beijing, China. E-mail: [liuzm@iccas.ac.cn](mailto:liuzm@iccas.ac.cn), [chenpl@iccas.ac.cn](mailto:chenpl@iccas.ac.cn)

<sup>b</sup> University of Chinese Academy of Sciences, Beijing 100049, China

#### Table of contents

|                                                      |   |
|------------------------------------------------------|---|
| 1. Chemical structures of used ILs in this work..... | 1 |
| 2. <sup>1</sup> H NMR Spectra.....                   | 2 |
| 3. DFT calculations references.....                  | 5 |

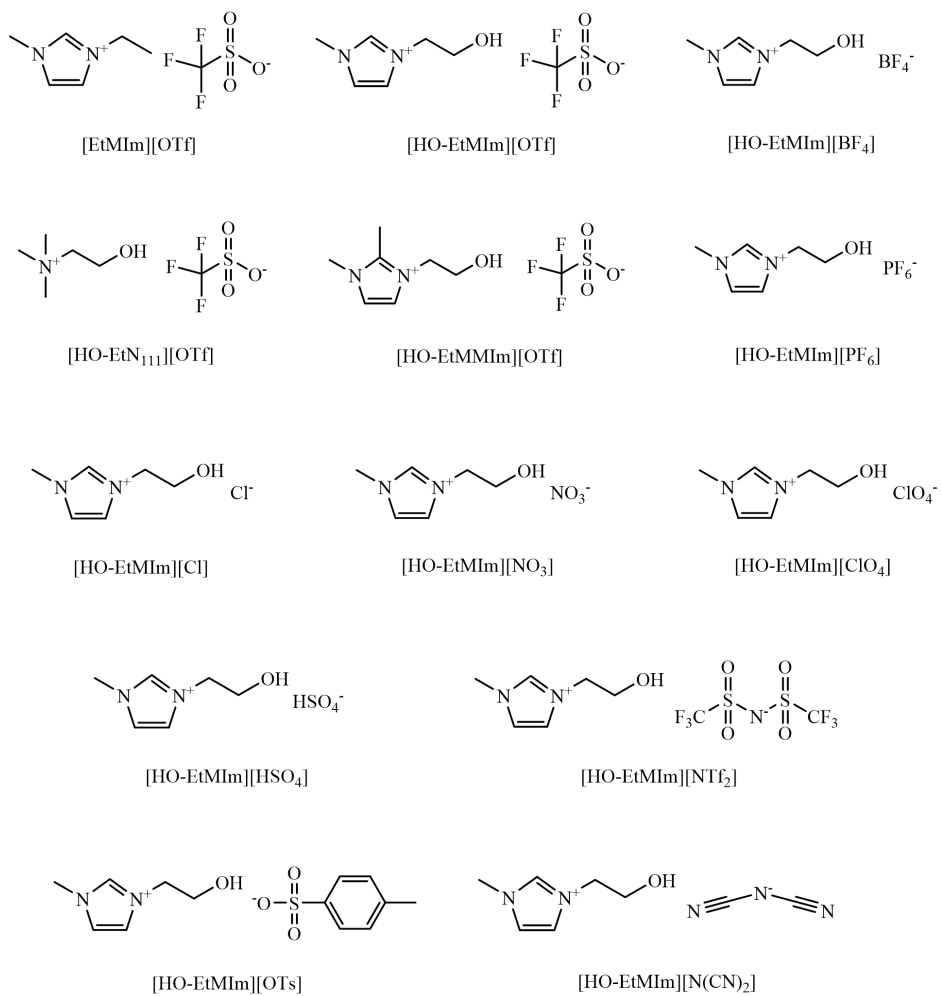

**Fig. S1** Chemical structures of ILs in this work

# <sup>1</sup>H NMR Spectra

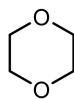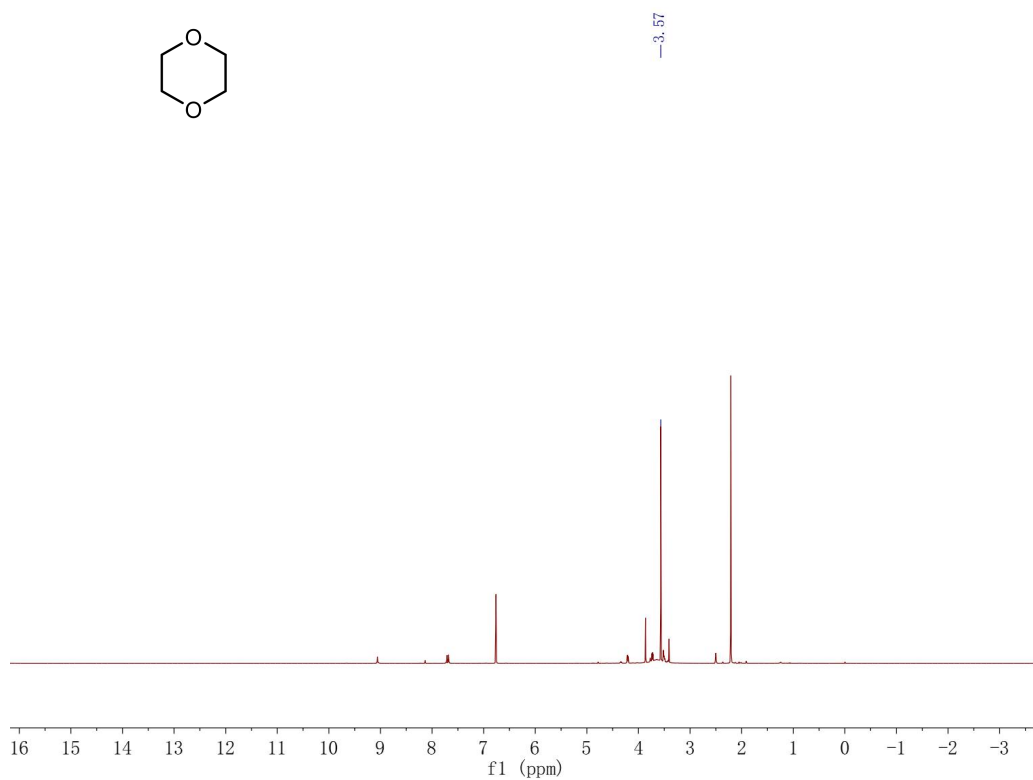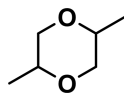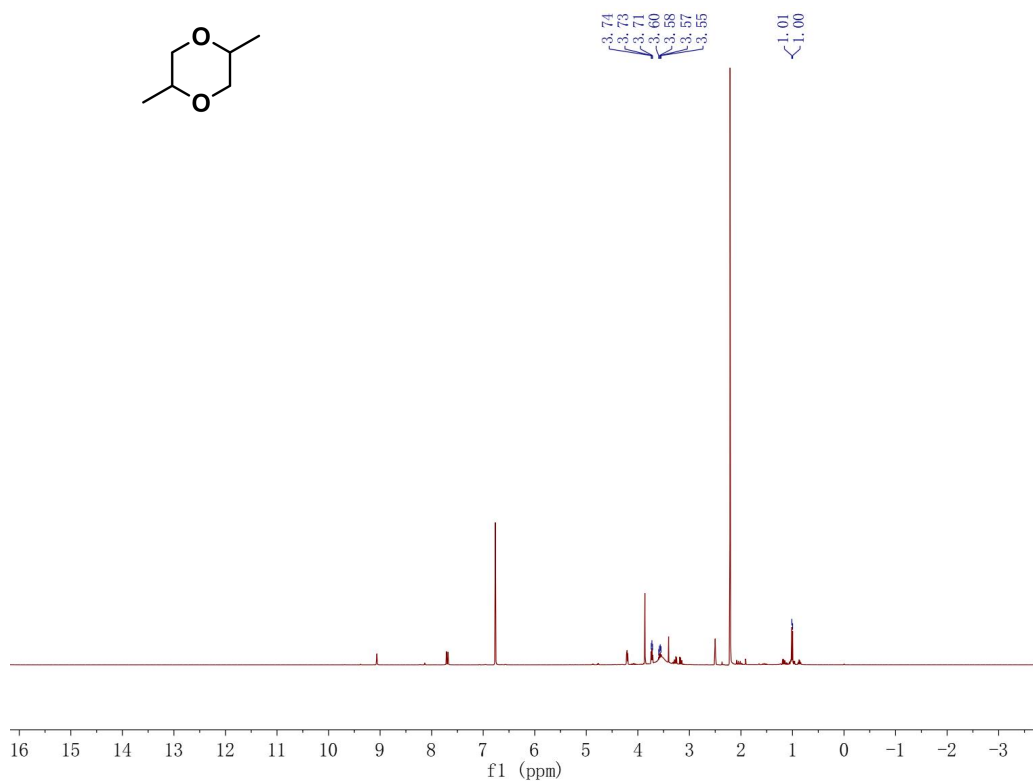

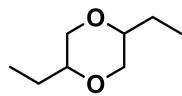

3.75  
3.74  
3.72  
3.30  
3.28  
3.27  
3.26  
3.20  
3.18  
3.16  
1.18  
1.16  
1.15  
1.02  
1.01

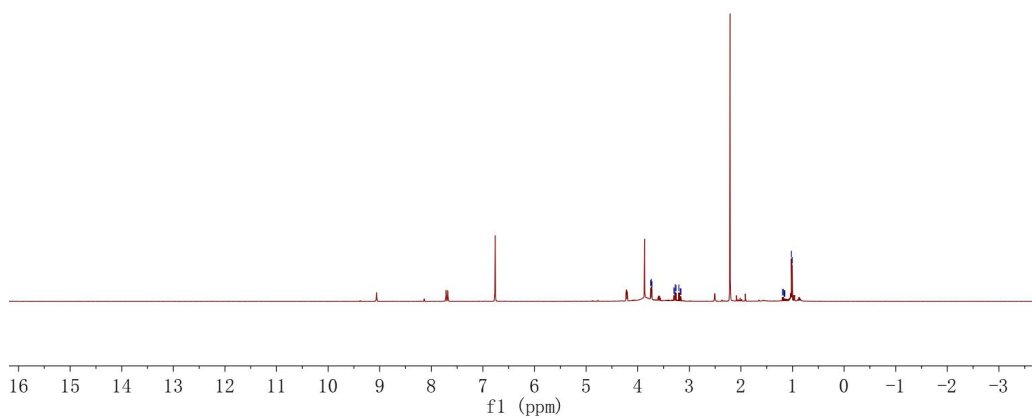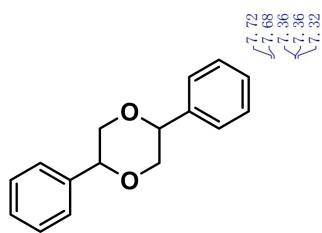

7.72  
7.68  
7.36  
7.32

4.96  
4.95  
4.93  
4.23  
3.59  
3.52  
3.37  
3.35  
3.33

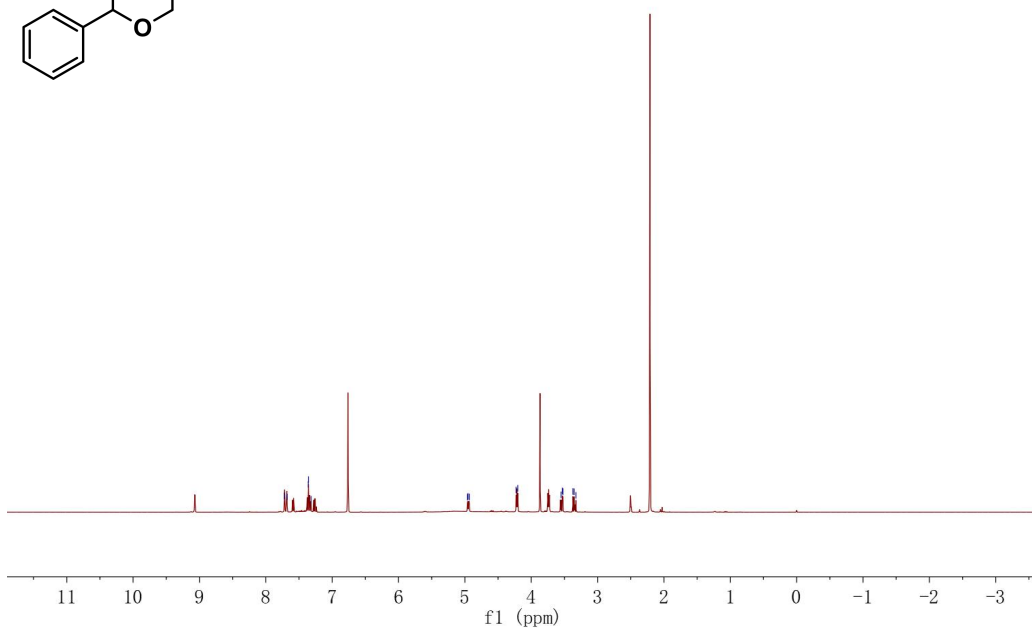

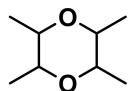

3.74  
3.73  
3.72

1.03  
1.01

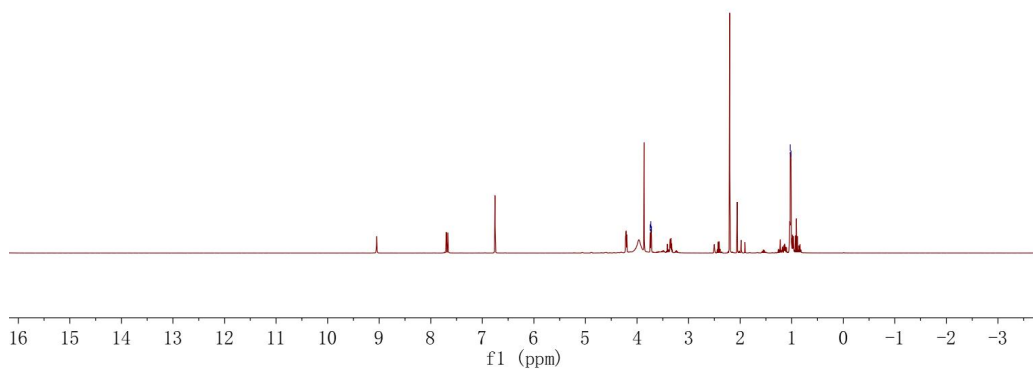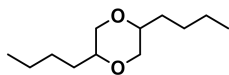

3.75  
3.73  
3.72  
3.61  
3.60  
3.57  
3.56  
3.51

1.19  
1.18  
1.16  
1.15  
1.02  
1.00

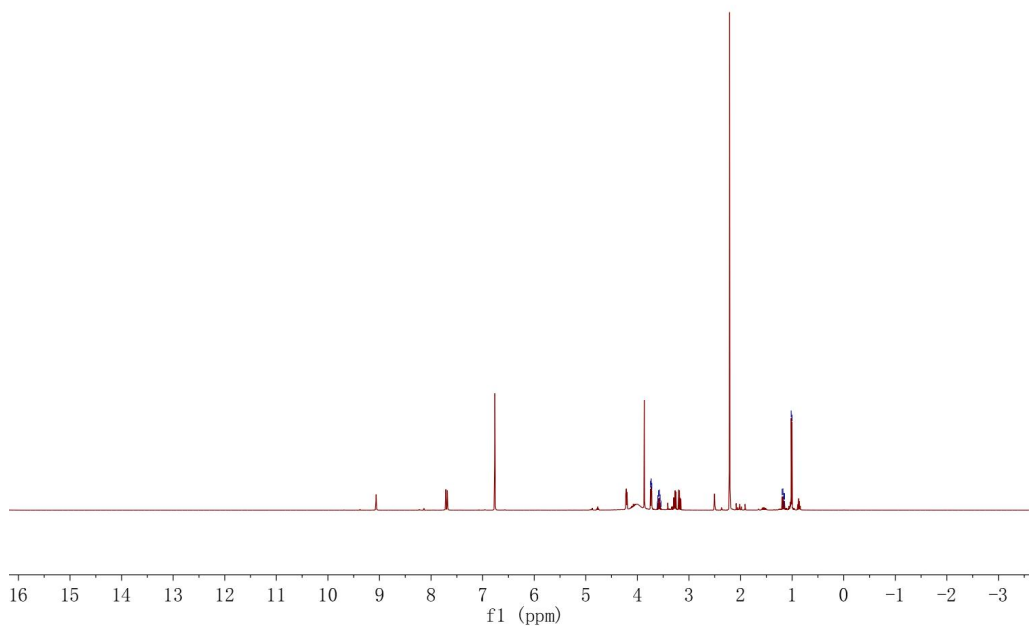

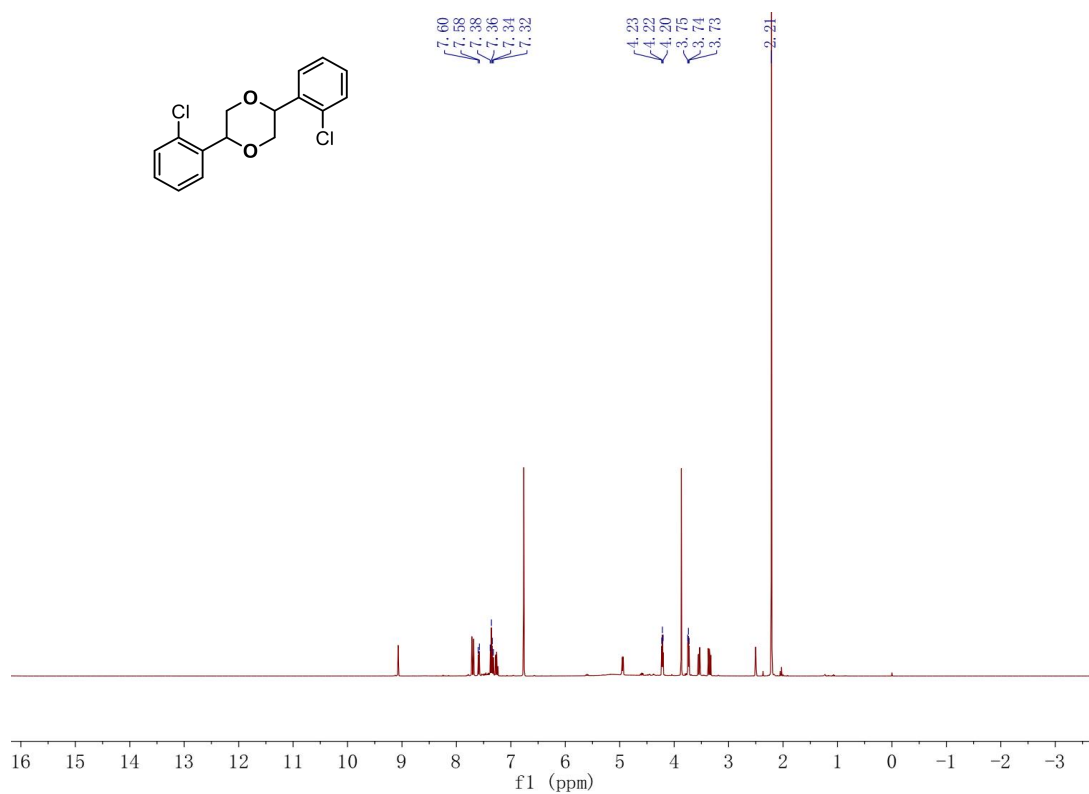

#### DFT calculations references:

1. Frisch, M.J., Trucks, G.W., Schlegel, H.B., Scuseria, G.E., Robb, M.A., Cheeseman, J.R., Scalmani, G., Barone, V., Petersson, G.A., Nakatsuji, H., et al. (2016). Gaussian 16 Rev. C.01.
2. Caldeweyher, E., Bannwarth, C., Grimme, S. (2017). Extension of the D3 dispersion coefficient model. *J. Chem. Phys.* 147, 034112. (10.1063/1.4993215)
3. Glendening, E.D., Landis, C.R., Weinhold, F. (2012). Natural bond orbital methods. *WIREs Computational Molecular Science* 2, 1-42. (10.1002/wcms.51)
